# Supplementary material for: Interfacial engineering of carbon dots with benzenediboronic acid for fluorescent biosensing
Source: Royal Society of Chemistry journal article supplement (doi:10.1039/c8na00166a), 2018-11-06
Supplement: c8na00166a1.pdf [file c8na00166a1.pdf]

## **Interfacial Engineering of Carbon Dots with Benzenediboronic Acid for Fluorescent Biosensing**

Min Pan, Zhen Xu, Qunying Jiang, Jie Feng, Junlin Sun, Fuan Wang, and Xiaoqing Liu\*

Key Laboratory of Analytical Chemistry for Biology and Medicine (Ministry of Education),  
College of Chemistry and Molecular Sciences, Wuhan University, Wuhan, Hubei, 430072, P.  
R. China.

\* To whom correspondence should be addressed. E-mail: [xiaoqingliu@whu.edu.cn](mailto:xiaoqingliu@whu.edu.cn).

## Supporting Information

### Table of Contents

|                                                                                                     |     |
|-----------------------------------------------------------------------------------------------------|-----|
| <b>Figure S1.</b> XRD pattern for the CDs .....                                                     | S2  |
| <b>Figure S2.</b> FTIR spectra of citric acid and CDs.....                                          | S3  |
| <b>Figure S3.</b> XPS spectra of CDs. ....                                                          | S4  |
| <b>Figure S4.</b> AFM characterization.....                                                         | S5  |
| <b>Figure S5.</b> Fluorescent intensity change of 3-hydroxybutyrate -derived CDs .....              | S6  |
| <b>Figure S6.</b> Stern–Volmer plot of the sensing system .....                                     | S7  |
| <b>Figure S7.</b> Florescence lifetime decay of the CDs.....                                        | S8  |
| <b>Figure S8.</b> Optimization of reaction conditions for H <sub>2</sub> O <sub>2</sub> assay. .... | S9  |
| <b>Table S1.</b> Analysis of glucose by different sensing procedures. ....                          | S10 |
| <b>Reference</b> .....                                                                              | S11 |

## Supporting Information

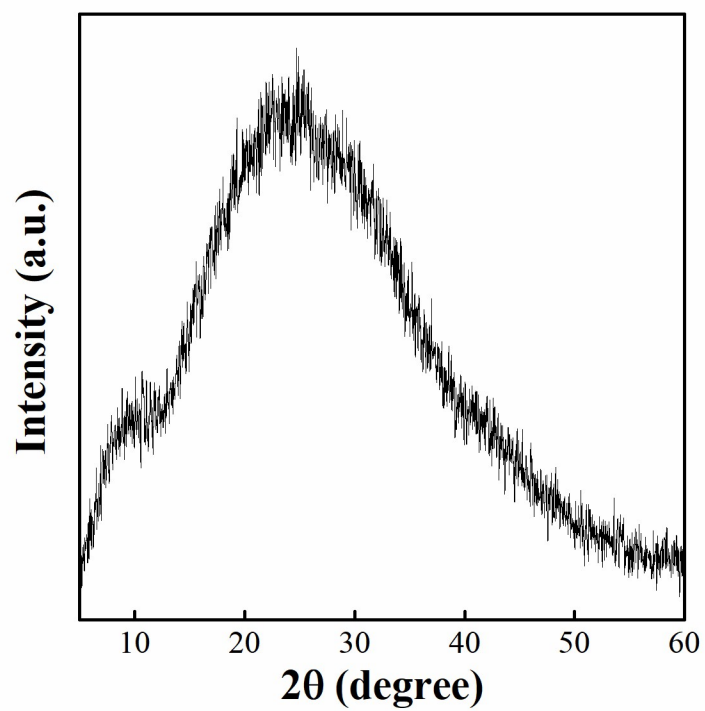

**Figure S1.** XRD pattern of the CDs

## Supporting Information

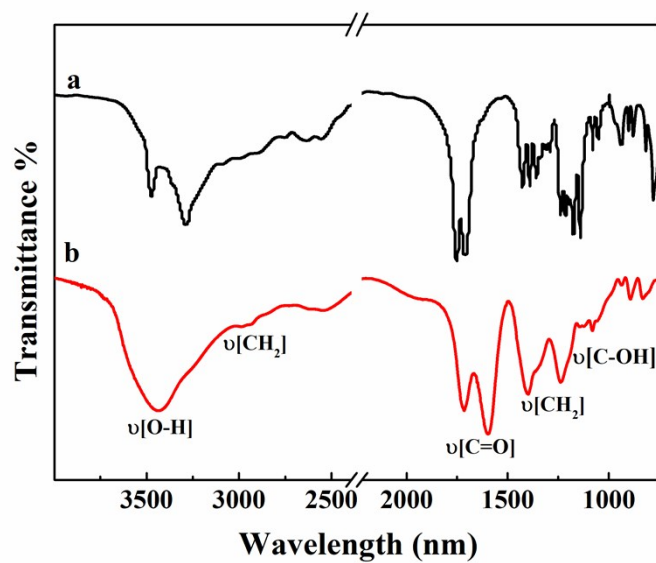

**Figure S2.** FTIR spectra of critic acid (a) and CDs (b).

## Supporting Information

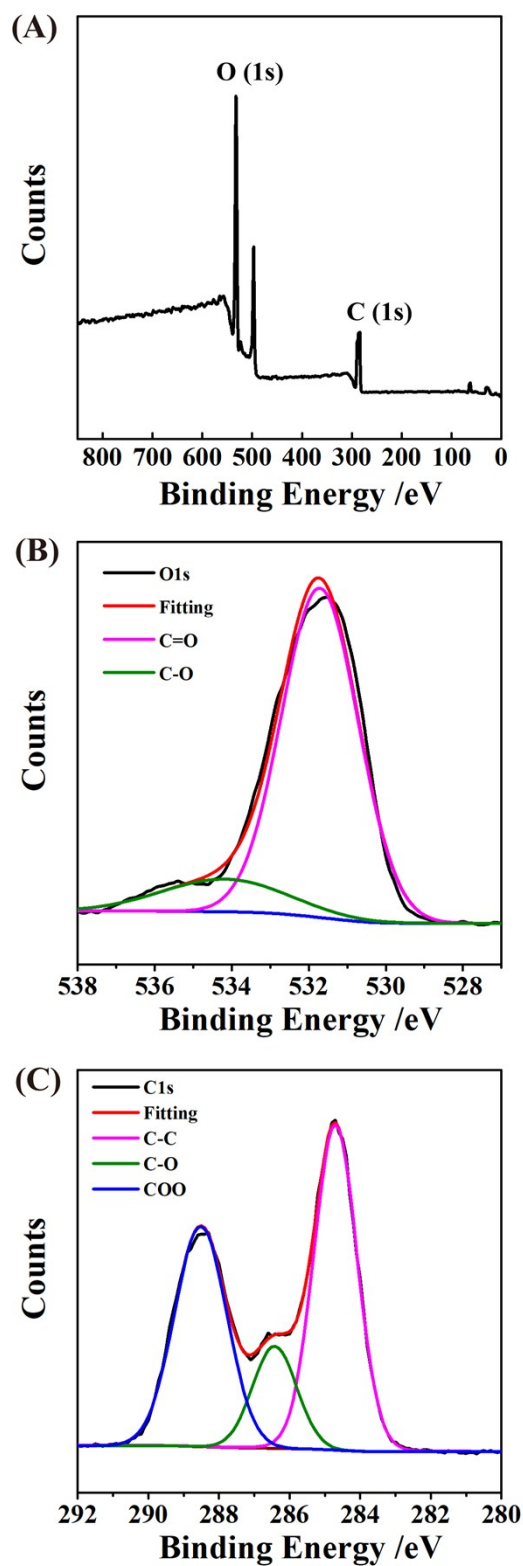

**Figure S3.** (A) XPS spectrum of CDs. (B) O 1s spectra of the CDs. (C) C 1s spectra of the CDs.

## Supporting Information

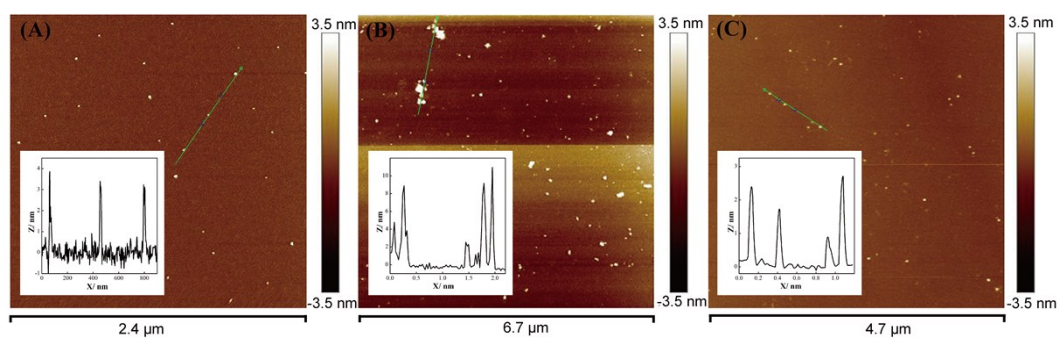

**Figure S4.** AFM image of CDs (A), and BDBA-associated CDs before (B) and after (C)  $\text{H}_2\text{O}_2$  incubation. Inset: Cross-section analysis of each sample.

## Supporting Information

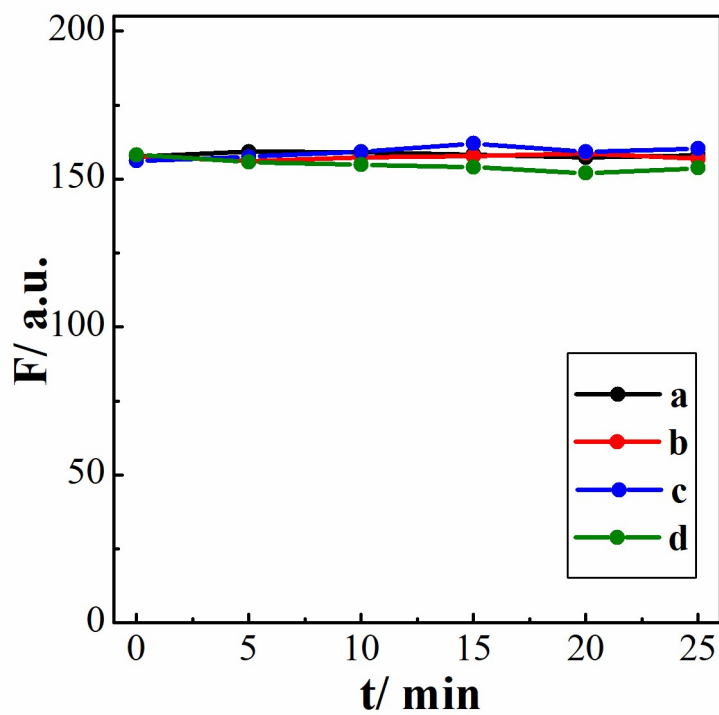

**Figure S5.** Fluorescence intensity changes of 3-hydroxybutyrate -derived CDs in the absence (a) and presence (b) of BDBA, in the presence of BDBA and in the absence of  $\text{H}_2\text{O}_2$  (c), and in the absence of both BDBA and  $\text{H}_2\text{O}_2$  (d).

## Supporting Information

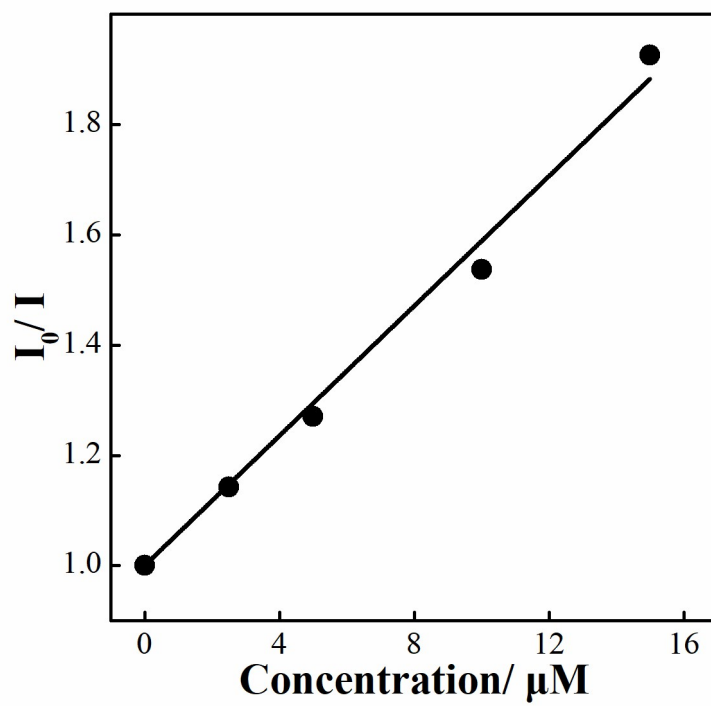

**Figure S6.** Stern–Volmer plot of the interaction of BDBA-conjugated CDs and H<sub>2</sub>O<sub>2</sub>.

## Supporting Information

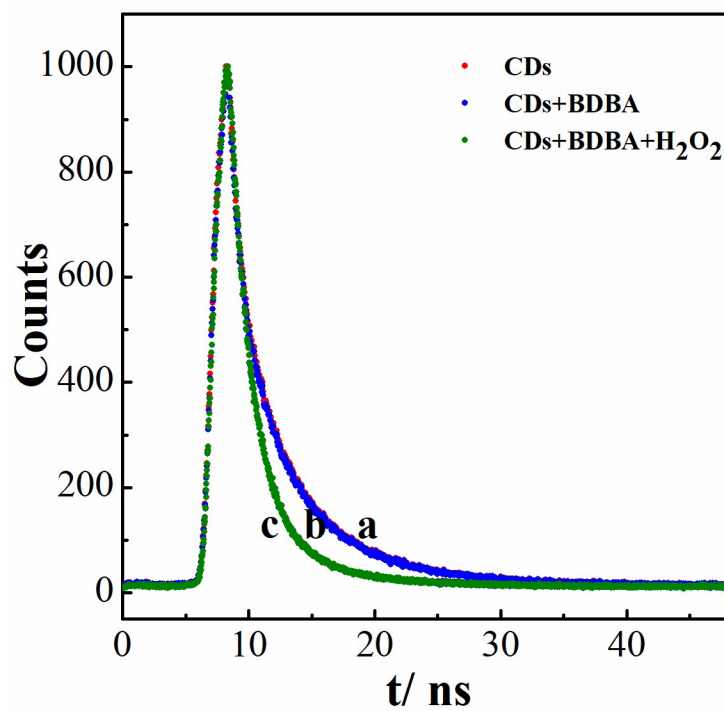

**Figure S7.** Fluorescence lifetime decay of the CDs (a), BDBA-conjugated CDs in the absence (b) and presence (c) of H<sub>2</sub>O<sub>2</sub>.

## Supporting Information

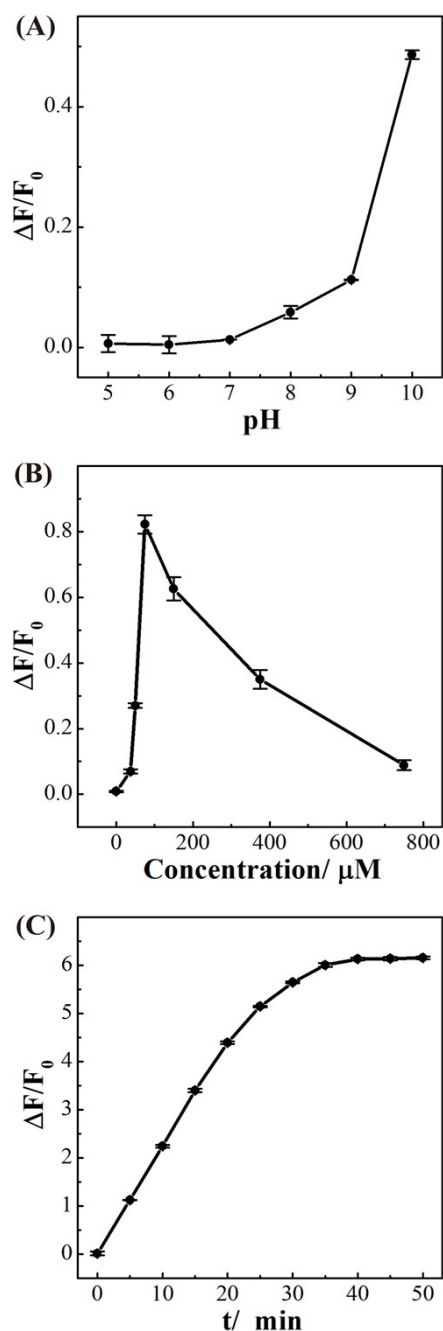

**Figure S8.** Optimization of reaction conditions for  $\text{H}_2\text{O}_2$  assay using the sensing platform. Both the concentration of BDBA and  $\text{H}_2\text{O}_2$  are  $75 \mu\text{M}$ . (A) Dependence of reaction pH on the fluorescence intensity of CDs. (B) Effect of reaction time on the fluorescence intensity of the system. (C) Effect of BDBA concentration on the fluorescence intensity changes of CDs.  $\Delta F = F_0 - F$ ,  $F_0$  and  $F$  represent the fluorescence intensity in the absence and presence of the  $\text{H}_2\text{O}_2$ , respectively. Error bars were derived from  $n = 5$  experiments.

## Supporting Information

**Table S1.** Analysis of glucose by different sensing procedures.

| Method          | System                                                                | Detection limit<br>( $\mu\text{M}$ ) | Reference |
|-----------------|-----------------------------------------------------------------------|--------------------------------------|-----------|
| colorimetric    | Pt nanoclusters                                                       | 0.28                                 | [1]       |
| colorimetric    | in situ growth of silver nanoparticles on<br>graphene quantum dots    | 0.17                                 | [2]       |
| electrochemical | gold nanoparticle/nitrogen-doped graphene                             | 12                                   | [3]       |
| electrochemical | bimetallic Pt–Au nanocatalysts                                        | 7.7                                  | [4]       |
| fluorescence    | CdS quantum dots assembled on silver<br>nanoparticles                 | 1860                                 | [5]       |
| fluorescence    | graphene quantum dots with boronic acid<br>appended bipyridinium salt | 1000                                 | [6]       |
| fluorescence    | B-doped carbon quantum dots                                           | 8                                    | [7]       |
| fluorescence    | MnO <sub>2</sub> nanosheet-modified upconversion<br>nano system       | 3.7                                  | [8]       |
| fluorescence    | carbon nanodots supported on silver<br>nanoparticles                  | 1.39                                 | [9]       |
| fluorescence    | BDBA-mediated fluorescence changes of<br>CDs                          | 0.4                                  | This work |

## Supporting Information

### Reference

- [1] L. Jin, Z. Meng, Y. Zhang, S. Cai, Z. Zhang, C. Li, L. Shang and Y. Shen, *ACS Appl. Mater. Interfaces*, 2017, **9**, 10027-10033.
- [2] S. Chen, X. Hai, X. W. Chen, J. H. Wang, *Anal. Chem.*, 2014, **86**, 6689-6694.
- [3] T. D. Thanh, J. Balamurugan, S. H. Lee, N. H. Kim, J. H. Lee, *Biosens. Bioelectron.*, 2016, **81**, 259-267.
- [4] Y. Tang, Q. Yang, T. Wu, L. Liu, Y. Ding, B. Yu, *Langmuir*, 2014, **30**, 6324.
- [5] S. Nantaphol, T. Watanabe, N. Nomura, W. Siangproh, O. Chailapakul, Y. Einaga, *Biosens. Bioelectron.*, 2017, **98**, 76-82.
- [6] Y. H. Li, L. Zhang, J. Huang, R. P. Liang, J. D. Qiu, *Chem. Commun.*, 2013, **49**, 5180-5182.
- [7] X. Shan, L. Chai, J. Ma, Z. Qian, J. Chen, H. Feng, *Analyst*, 2014, **139**, 2322-2325.
- [8] J. Yuan, Y. Cen, X. J. Kong, S. Wu, C. L. Liu, R. Q. Yu, X. Chu, *ACS Appl. Mater. Interfaces*, 2015, **7**, 10548-10555.
- [9] J. L. Ma, B. C. Yin, X. Wu, B. C. Ye, *Anal. Chem.*, 2017, **89**, 1323-1328.
